# Supplementary material for: A facile method for the synthesis of a sintering dense nano-grained Na3Zr2Si2PO12 Na+-ion solid-state electrolyte
Source: Royal Society of Chemistry journal article supplement (doi:10.1039/d0cc07261c), 2021-01-01
Supplement: d0cc07261c1.pdf [file d0cc07261c1.pdf]

## **Supporting Information**

**A facile method for synthesis of sintering dense nano-grained  $\text{Na}_3\text{Zr}_2\text{Si}_2\text{PO}_{12}$   $\text{Na}^+$ -  
ion solid-state electrolyte**

## Experiment

**Preparation of zirconia-silica precursor.** The zirconia-silica precursor was prepared by following the modified classical Stöber approach.<sup>1</sup> In a typical procedure, 23 mL of deionized water, 37 mL of ethanol and 13 mL of  $\text{NH}_3 \cdot \text{H}_2\text{O}$  were mixing to buffer solution. Then, 1.8 mL of zirconium butoxide (80 w/w in butanol, Aladdin) and 3.2 mL of tetraethoxysilane (TEOS) were first dissolved in 65 mL of ethanol and subsequently added dropwise into the buffer solution under vigorously stirring over 5 h. The precipitate was received after centrifugation and washed with deionized water and subsequently dried at 60 °C for 24 h. Last, the dried precipitate was heated at 900 °C for 3 h to collect the precursor zirconia-silica.

**Preparation of  $\text{Na}_3\text{Zr}_2\text{Si}_2\text{PO}_{12}$ .** To obtain the nano-grained  $\text{Na}_3\text{Zr}_2\text{Si}_2\text{PO}_{12}$ , stoichiometric amounts of salts of sodium and phosphate, and the zirconia-silica precursor were milled using zirconia jar for 4 h. Annealing the mixture at 900 °C for 12 h gave the NASICON-structured powder. Sintering the as-pressed powder at 1260 °C for 16 h yielded the dense nano-grained  $\text{Na}_3\text{Zr}_2\text{Si}_2\text{PO}_{12}$ . The micron-grained  $\text{Na}_3\text{Zr}_2\text{Si}_2\text{PO}_{12}$  was also prepared through conventional solid-state reaction method. Stoichiometric amounts of salts of sodium and phosphate, zirconia, and silica were milled for 4 h, annealed at 900 °C for 12 h, and sintered at 1260 °C for 16 h.

**Characterizations.** The phase structures and morphologies were examined by X-ray diffraction (XRD, Bruker D2 PHASER,  $\text{Cu-K}\alpha$ ), scanning electron microscope (SEM, Hitachi, Su8020), and transmission electron microscopy (TEM, JEM-2100F). The distribution of elements was analysed by energy dispersive X-ray spectroscopy (EDX,

HORIBA, EX250). The Na<sup>+</sup>-ion conductivity was determined by electrochemical impedance spectroscopy (Autolab PGSTAT302N) with Ag ion-blocking electrodes, under amplitude voltage of 10 mV and frequency range of 10<sup>6</sup>-10<sup>-1</sup> Hz. Na<sub>3</sub>Zr<sub>2</sub>Si<sub>2</sub>PO<sub>12</sub>/Na symmetric cells were fabricated to measure the galvanostatic cycling with 1 h deposition and 1 h stripping at current density of 10 μA cm<sup>-2</sup> and temperature of 25 °C.

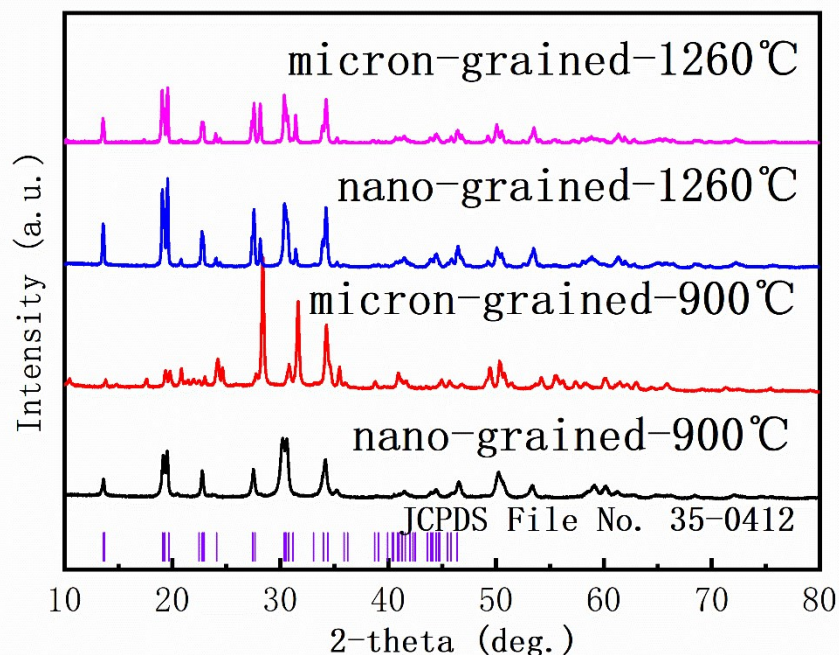

**Figure S1.** XRD patterns of the nano-grained and controlled micron-grained  $\text{Na}_3\text{Zr}_2\text{Si}_2\text{PO}_{12}$  annealing at 900 °C and sintering at 1260 °C.

$\text{Na}_3\text{Zr}_2\text{Si}_2\text{PO}_{12}$  was prepared with the zirconia–silica binary oxides and salts of sodium and phosphate, annealing at 900 °C and sintering at 1260 °C. Shown in Figure S1 is XRD patterns of the as-prepared samples, revealing the phase comparison of the solid-state electrolyte synthesized by the pre-calcined zirconia–silica precursor method with the conventional solid-state method. Intriguingly, annealing the mixture at 900 °C through the pre-calcined zirconia-silica precursor method displays the desired NASICON structure of a monoclinic phase (space group  $C2/c$ , JCPDS File No. 35-0412), except for a slight  $\text{Na}_3\text{PO}_4$  impurity. In comparison, processing the raw materials at the same temperature of 900 °C but through the conventional solid-state method presents a mainly monoclinic  $\text{ZrO}_2$  phase (JCPDS File No. 37-1484) which is the same as that of the raw monoclinic zirconia, together with  $\text{Na}_3\text{PO}_4$ ,

$\text{Na}_4\text{SiO}_4$ , and NASICON phases, indicating that the raw monoclinic zirconia hardly reacts with the other components under these conditions. Sintering the samples at 1260 °C through both methods presents, unsurprisingly, the NASICON structure.

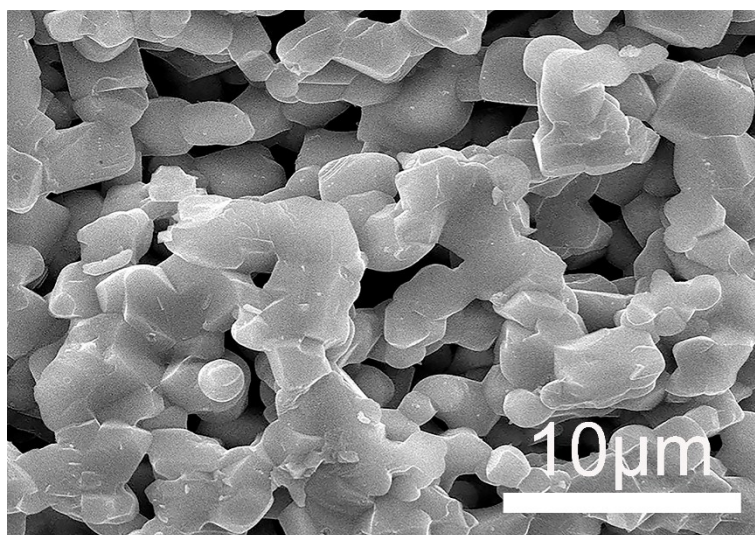

**Figure S2.** Top SEM view of controlled micron-grained  $\text{Na}_3\text{Zr}_2\text{Si}_2\text{PO}_{12}$  sintering at 1260 °C.

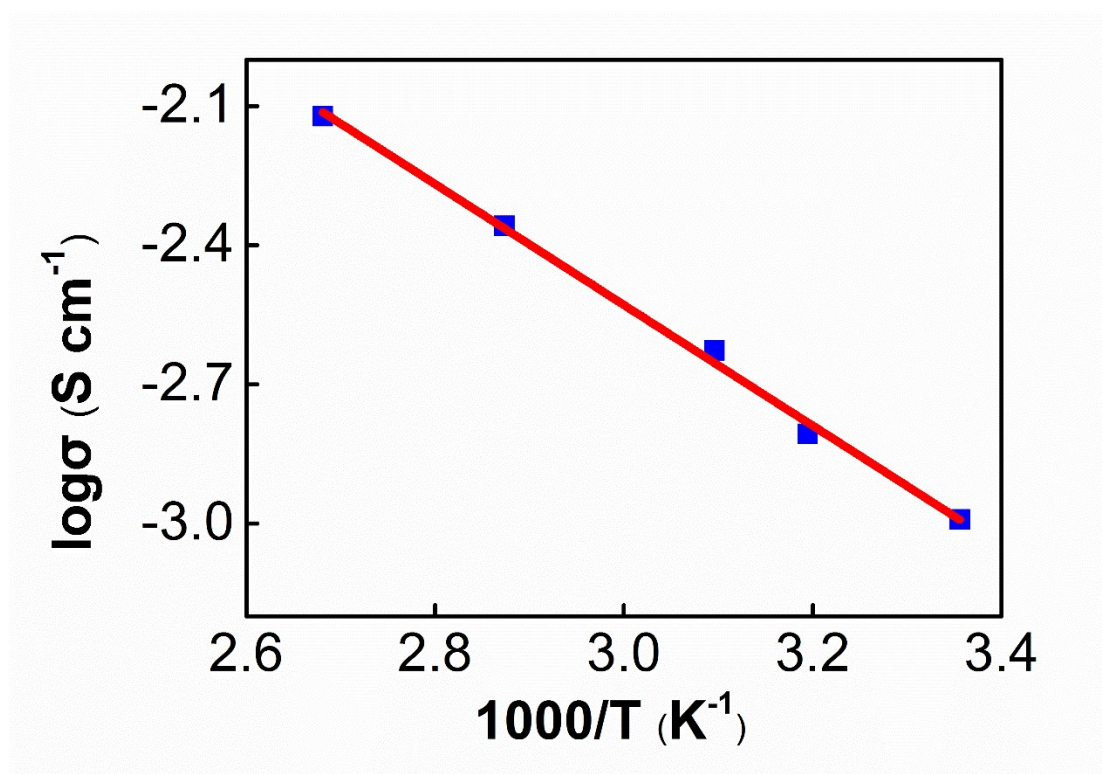

**Figure S3.** Arrhenius curve of the nano-grained  $\text{Na}_3\text{Zr}_2\text{Si}_2\text{PO}_{12}$ .

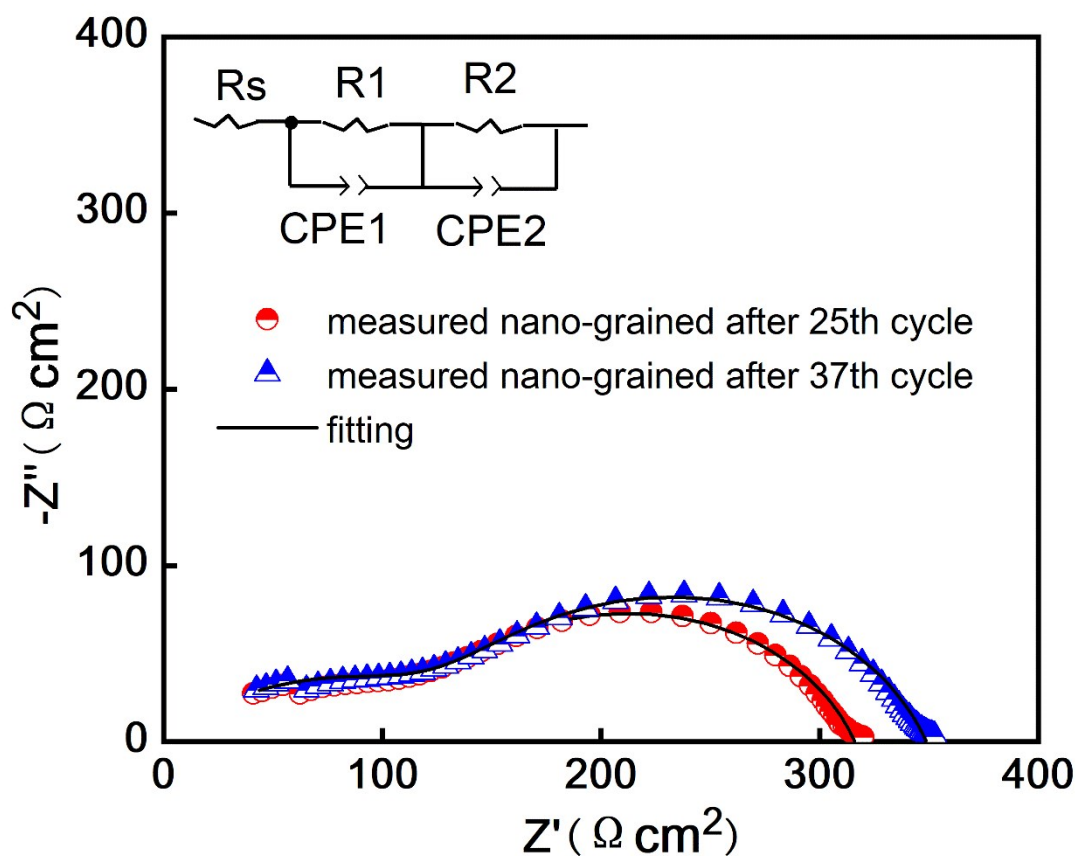

**Figure S4.** Nyquist plots of Na/nano-grained  $\text{Na}_3\text{Zr}_2\text{Si}_2\text{PO}_{12}/\text{Na}$  symmetrical cell for the 25<sup>th</sup> and 37<sup>th</sup> cycling. A  $(R_s)(R_1\text{CPE1})(R_2\text{CPE2})$  equivalent circuit (inset of Fig. 3d) is used to fit the impedance spectra, where  $R_s$  and  $R_1$  represent the grain and grain-boundary resistances of the electrolyte, and  $R_2$  represents the interfacial resistances for Na and electrolyte, CPE represents a constant phase element.

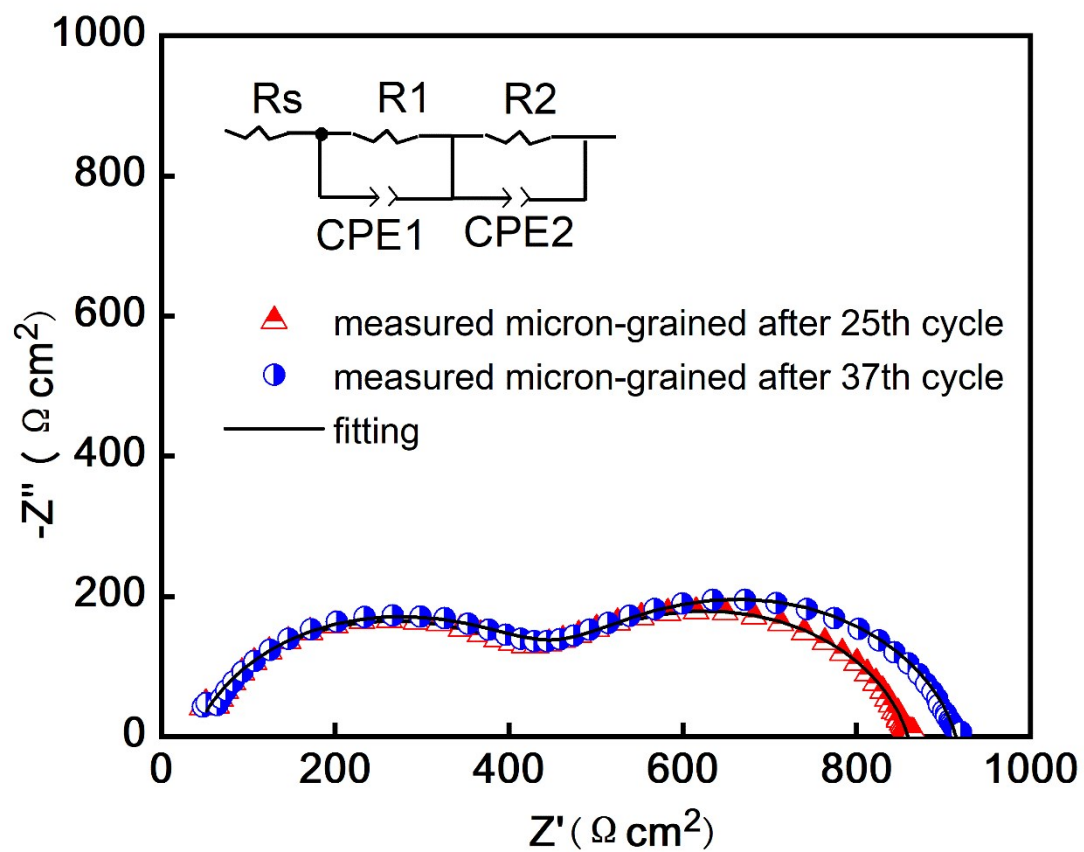

**Figure S5.** Nyquist plots of Na/micron-grained  $\text{Na}_3\text{Zr}_2\text{Si}_2\text{PO}_{12}/\text{Na}$  symmetrical cell for the 25<sup>th</sup> and 37<sup>th</sup> cycling.

## Supporting Note

1 W. Stöber, A. Fink and E. Bohn, *J. Colloid Interface Sci.*, 1968, **26**, 62.
